# Supplementary material
Source: PubMed Central journal article supplement (PMC2766273)
Supplement: NIHMS143241-supplement-supplementary_math_details.pdf [file NIHMS143241-supplement-supplementary_math_details.pdf]

# Supplementary Materials for “A Class of Markov Models for Longitudinal Ordinal Data”

**Keunbaik Lee\***

Ph.D. candidate, Department of Statistics, University of Florida, Gainesville FL 32611,  
U.S.A.

**and**

**Michael J. Daniels†**

Associate Professor, Department of Statistics, University of Florida, Gainesville FL  
32611, U.S.A.

January 8, 2007

---

\* *email:* lee@stat.ufl.edu

† *email:* mdaniels@stat.ufl.edu

## APPENDIX A

### *Detailed calculations for Fisher-scoring for OMTM(1)*

Let  $\theta_1$  and  $\theta_1^*$  represent the parameter vector containing  $\beta_j$  and  $\beta$  for  $j = 1, \dots, K-1$ .

The forms of the derivatives for Fisher-scoring algorithm follow

$$\begin{aligned} \frac{\partial \log L^{(2)}}{\partial \theta_1} &= \sum_{i=1}^N \sum_{t=2}^{n_i} \sum_{k=1}^{K-1} (y_{itk} - P_{itk}^c) \frac{\partial \Delta_{itk}}{\partial \theta_1}, \\ \frac{\partial \log L^{(1)}}{\partial \theta_1} &= \sum_{i=1}^N \sum_{k=1}^{K-1} \left( R_{i1k} - R_{i1k+1} \frac{e^{\phi_{i1k}}}{1 + e^{\phi_{i1k}}} \right) \left\{ \frac{\partial \phi_{i1k}}{\partial P_{i1k}^M} \frac{\partial P_{i1k}^M}{\partial \theta_1} + \frac{\partial \phi_{i1k}}{\partial P_{i1k+1}^M} \frac{\partial P_{i1k+1}^M}{\partial \theta_1} \right\}, \\ \frac{\partial \log L^{(2)}}{\partial \alpha_{1b}^{(d)}} &= \sum_{i=1}^N \sum_{t=2}^{n_i} \left\{ \sum_{k=1}^{K-1} (y_{itk} - P_{itk}^c) \frac{\partial \Delta_{itk}}{\partial \alpha_{1b}^{(d)}} + (y_{itd} - P_{itd}^c) y_{it-1b} z_{it} \right\}, \end{aligned}$$

for  $a = 1, \dots, K-1$ , and  $d = 1, \dots, K-1$ .

$$\begin{aligned} E_y \left( -\frac{\partial^2 \log L}{\partial \theta_1 \partial \theta_1^{*T}} \right) &= E_y \left( \sum_{i=1}^N \sum_{t=2}^{n_i} \sum_{k=1}^{K-1} \sum_{g=1}^{K-1} \frac{\partial P_{itk}^c}{\partial \Delta_{itg}} \frac{\partial \Delta_{itk}}{\partial \theta_1} \frac{\partial \Delta_{itg}}{\partial \theta_1^{*T}} \right) + E_y \left( -\frac{\partial^2 \log L^{(1)}}{\partial \theta_1 \partial \theta_1^{*T}} \right), \\ E_y \left( -\frac{\partial^2 \log L}{\partial \alpha_{1b}^{(d)} \partial \alpha_{1e}^{(f)T}} \right) &= E_y \left[ \sum_{i=1}^N \sum_{t=2}^{n_i} \left\{ \sum_{k=1}^{K-1} \left( \sum_{g=1}^{K-1} \frac{\partial P_{itk}^c}{\partial \Delta_{itg}} \frac{\partial \Delta_{itg}}{\partial \alpha_{1b}^{(d)}} \frac{\partial \Delta_{itk}}{\partial \alpha_{1e}^{(f)T}} + \frac{\partial P_{itk}^c}{\partial \gamma_{itb}^{(d)}} \frac{\partial \gamma_{itb}^{(d)}}{\partial \alpha_{1b}^{(d)}} \frac{\partial \Delta_{itk}}{\partial \alpha_{1e}^{(f)T}} \right) \right. \right. \\ &\quad \left. \left. + \sum_{g=1}^{K-1} \frac{\partial P_{itf}^c}{\partial \Delta_{itg}} \frac{\partial \Delta_{itg}}{\partial \alpha_{1b}^{(d)}} y_{it-1b} z_{it}^T + \frac{\partial P_{itf}^c}{\partial \gamma_{itb}^{(d)}} \frac{\partial \gamma_{itb}^{(d)}}{\partial \alpha_{1b}^{(d)}} y_{it-1f} z_{it}^T \right\} \right], \\ E_y \left( -\frac{\partial^2 \log L}{\partial \alpha_{1b}^{(d)} \partial \theta_1^T} \right) &= E_y \left[ \sum_{i=1}^N \sum_{t=2}^{n_i} \sum_{k=1}^{K-1} \left\{ \sum_{g=1}^{K-1} \frac{\partial P_{itk}^c}{\partial \Delta_{itg}} \frac{\partial \Delta_{itg}}{\partial \alpha_{1b}^{(d)}} \frac{\partial \Delta_{itk}}{\partial \theta_1^T} + \frac{\partial P_{itk}^c}{\partial \gamma_{itb}^{(d)}} \frac{\partial \gamma_{itb}^{(d)}}{\partial \alpha_{1b}^{(d)}} \frac{\partial \Delta_{itk}}{\partial \theta_1^T} \right\} \right], \end{aligned} \tag{A.1}$$

for  $b = 1, \dots, K-1$ , and  $d = 1, \dots, K-1$ . Note that (A.1) is zero if there are no missing observations.

To compute the score vector and information matrix, we also need derivatives of  $\Delta_{it}$  with respect to  $\beta_0$ ,  $\beta$ , and  $\alpha$ . They can be obtained as the solution to the following system

of linear equations,

$$\begin{aligned} \frac{\partial \Delta_{it1}}{\partial \theta_1} \sum_{g=1}^K \frac{\partial h_{ikg}^{(t)}}{\partial \Delta_{it1}} \pi_{ig}^{(t-1)} + \dots + \frac{\partial \Delta_{itK-1}}{\partial \theta_1} \sum_{g=1}^K \frac{\partial h_{ikg}^{(t)}}{\partial \Delta_{itK-1}} \pi_{ig}^{(t-1)} &= \frac{\partial \pi_{ik}^{(t)}}{\partial \theta_1} - \sum_{g=1}^K h_{ikg}^{(t)} \frac{\partial \pi_{ig}^{(t-1)}}{\partial \theta_1}, \\ \frac{\partial \Delta_{it1}}{\partial \alpha_{1b}^{(d)}} \sum_{g=1}^K \frac{\partial h_{ikg}^{(t)}}{\partial \Delta_{it1}} \pi_{ig}^{(t-1)} + \dots + \frac{\partial \Delta_{itK-1}}{\partial \alpha_{1b}^{(d)}} \sum_{g=1}^K \frac{\partial h_{ikg}^{(t)}}{\partial \Delta_{itK-1}} \pi_{ig}^{(t-1)} &= - \sum_{g=1}^K \frac{\partial h_{ikg}^{(t)}}{\partial \gamma_{itb}^{(d)}} \frac{\partial \gamma_{itb}^{(d)}}{\partial \alpha_{1b}^{(d)}} \pi_{ig}^{(t-1)}, \end{aligned}$$

where  $h_{ikg}^{(t)} = P(Y_{it} = k | Y_{it-1} = g, x_{it})$ .

Estimates of  $\Delta_{it}$  can be obtained using Newton-Raphson. Let

$$f(\Delta_{it}) = (f_1(\Delta_{it}), \dots, f_{K-1}(\Delta_{it})),$$

where  $f_k(\Delta_{it}) = \sum_{g=1}^K h_{ikg}^{(t)} \pi_{ig}^{(t)} - \pi_{ik}^{(t)}$  and  $h_{itkg}^{(t)} = P(Y_{it} = k | Y_{it-1} = g, x_{it-1})$ . We obtain

$$\Delta_{it}^{(n+1)} = \Delta_{it}^{(n)} - \left( \frac{\partial f(\Delta_{it})}{\partial \Delta_{it}} \right)^{-1} f(\Delta_{it}),$$

where

$$\frac{\partial f(\Delta_{it})}{\partial \Delta_{itj}} = \begin{cases} \sum_{g=1}^K h_{ikg}^{(t)} (1 - h_{ikg}^{(t)}) \pi_{ig}^{(t-1)}, & \text{if } j = k; \\ - \sum_{g=1}^K h_{ikg}^{(t)} h_{ijg}^{(t)} \pi_{ig}^{(t-1)}, & \text{if } j \neq k. \end{cases}$$

## APPENDIX B

### *Maximum likelihood for the second order models*

The maximum likelihood algorithm for the OMTM(2) is given below. The OMTM(2) likelihood function consists of three components, conditional probabilities for  $t > 2$ ,  $t = 2$ ,

and marginal probabilities for  $t = 1$ . The log likelihood is given as

$$\begin{aligned}
& \log L(\theta; y) \\
= & \sum_{i=1}^N \sum_{t=3}^{n_i} \left\{ \sum_{k=1}^{K-1} y_{itk} \left( \Delta_{itk} + \sum_{m=1}^2 \gamma_{itm1}^{(k)} y_{it-m1} + \cdots + \gamma_{itmK-1}^{(k)} y_{it-mK-1} \right) + \log P_{itK}^c \right\} \\
& + \sum_{i=1}^N \left\{ \sum_{k=1}^{K-1} y_{i2k} \left( \Delta_{i2k} + \gamma_{i211}^{(k)} y_{i11} + \cdots + \gamma_{i21K-1}^{(k)} y_{i1K-1} \right) + \log P_{i2K}^c \right\} \\
& + \sum_{i=1}^N \sum_{k=1}^{K-1} \{ R_{i1k} \phi_{i1k} - R_{i1k+1} g(\phi_{i1k}) \} \\
\stackrel{\text{let}}{=} & \log L^{(3)}(\theta; y) + \log L^{(2)}(\theta; y) + \log L^{(1)}(\theta; y). \tag{B.2}
\end{aligned}$$

where

$$P_{itk}^c = \begin{cases} P(Y_{it} = k | y_{it-1}, y_{it-2}), & \text{if } t \geq 3; \\ P(Y_{it} = k | y_{it-1}), & \text{if } t = 2. \end{cases}$$

To evaluate the likelihood, we need to evaluate both the contributions from the initial state,  $L^{(1)}$  and  $L^{(2)}$ , and the subsequent contribution from each transition probability,  $L^{(3)}$ . Let  $\theta = (\beta_0, \beta, \alpha)$  be the vector of parameters. Then,

$$\frac{\partial \log L}{\partial \theta} = \frac{\partial \log L^{(3)}}{\partial \theta} + \frac{\partial \log L^{(2)}}{\partial \theta} + \frac{\partial \log L^{(1)}}{\partial \theta}.$$

The likelihood equations are given in the web appendix. The Fisher-scoring method can be used to solve the likelihood equations. The expectations of the negative second derivatives of log likelihood are given by

$$E \left( -\frac{\partial^2 \log L}{\partial \theta \partial \theta^T} \right) = E \left( -\frac{\partial^2 \log L^{(3)}}{\partial \theta \partial \theta^T} \right) + E \left( -\frac{\partial^2 \log L^{(2)}}{\partial \theta \partial \theta^T} \right) + E \left( -\frac{\partial^2 \log L^{(1)}}{\partial \theta \partial \theta^T} \right).$$

For the explicit forms of these expectations, see the web appendix. The derivatives  $\frac{\partial \Delta_{itk}}{\partial \beta_{0b}}$ ,  $\frac{\partial \Delta_{itk}}{\partial \beta}$ , and  $\frac{\partial \Delta_{itg}}{\partial \alpha_b^{(d)}}$  are given in the web appendix.

The algorithm for maximum likelihood estimation for the IOMTM(2) is similar.

## APPENDIX C

### *Additional simulation results*

We also conducted simulations with the same marginal mean models as in the simulations in the manuscript, but now generating data under the following IOMTM(2),

$$\log \left( \frac{P(Y_{it} = k | Y_{it-1}, Y_{it-2}, x_{it})}{P(Y_{it} = K | Y_{it-1}, Y_{it-2}, x_{it})} \right) = \Delta_{itk} + Y_{it-1} \gamma_{it11}^{(k)} + Y_{it-1}^2 \gamma_{it12}^{(k)} + Y_{it-2} \gamma_{it21}^{(k)} + Y_{it-2}^2 \gamma_{it22}^{(k)},$$

with  $\gamma_{itmj}^{(k)} = \alpha_{mj0}^{(k)}$  for  $m = 1, 2$ ;  $j = 1, 2$  where  $(\alpha_{110}^{(1)}, \alpha_{110}^{(2)}, \alpha_{110}^{(3)}) = (-0.1, 0.1, 0.2)$ ,  $(\alpha_{120}^{(1)}, \alpha_{120}^{(2)}, \alpha_{120}^{(3)}) = (-0.2, 0.1, 0.1)$ ,  $(\alpha_{210}^{(1)}, \alpha_{210}^{(2)}, \alpha_{210}^{(3)}) = (-0.5, -0.7, -0.5)$ , and  $(\alpha_{220}^{(1)}, \alpha_{220}^{(2)}, \alpha_{220}^{(3)}) = (-0.4, 0.5, 0.6)$ . We then fit an IOMTM(1) with  $z_{it} = 1$ . The results with no dropout appear in Table 1 and those with (MAR) dropout appear in Table 2.

**Table 1**

*Bias of IOMTM(2) maximum likelihood estimators when no data are missing. Displayed is the average regression coefficient estimates and the percent relative bias,  $100 \times (\hat{\beta} - \beta)/\beta$*

---



---

| Unstructured Marginal Mean |       |       |         | Structured Marginal Mean |       |       |         |
|----------------------------|-------|-------|---------|--------------------------|-------|-------|---------|
| para.                      | true  | mean  | bias(%) | para.                    | true  | mean  | bias(%) |
| int1                       | -1.00 | -1.01 | 1.0     | int1                     | -1.00 | -1.00 | 0.0     |
| int2                       | 0.70  | 0.70  | 0.0     | int2                     | 0.70  | 0.70  | 0.0     |
| int3                       | 2.00  | 2.00  | 0.0     | int3                     | 2.00  | 2.00  | 0.0     |
| grp1                       | 0.10  | 0.10  | 0.0     | grp1                     | 0.10  | 0.10  | 0.0     |
| grp2                       | -0.50 | -0.50 | 0.0     | grp2                     | -0.50 | -0.50 | 0.0     |
| vis1                       | 0.10  | 0.10  | 0.0     | vis                      | -0.50 | -0.51 | 2.0     |
| vis2                       | -1.50 | -1.50 | 0.0     |                          |       |       |         |
| vis3                       | 1.20  | 1.21  | 0.8     |                          |       |       |         |
| vis4                       | -0.40 | -0.40 | 0.0     |                          |       |       |         |
| vis5                       | 0.80  | 0.80  | 0.0     |                          |       |       |         |
| vis6                       | -0.30 | -0.30 | 0.0     |                          |       |       |         |
| vis7                       | -1.00 | -1.00 | 0.0     |                          |       |       |         |

**Table 2**

*Bias of IOMTM(2) maximum likelihood estimators when data are missing at random (MAR). Displayed is the average regression coefficient estimates and the percent relative bias,  $100 \times (\hat{\beta} - \beta)/\beta$*

---



---

| Unstructured Marginal mean |       |       |         | Structured Marginal mean |       |       |         |
|----------------------------|-------|-------|---------|--------------------------|-------|-------|---------|
| para.                      | truth | mean  | bias(%) | truth                    | para. | mean  | bias(%) |
| int1                       | -1.00 | -0.94 | -5.6    | int1                     | -1.00 | -1.02 | 1.8     |
| int2                       | 0.70  | 0.79  | 12.6    | int2                     | 0.70  | 0.71  | 1.0     |
| int3                       | 2.00  | 2.06  | 3.0     | int3                     | 2.00  | 1.97  | -1.6    |
| grp1                       | 0.10  | 0.10  | 0.0     | grp1                     | 0.10  | 0.10  | 0.0     |
| grp2                       | -0.50 | -0.49 | -1.6    | grp2                     | -0.50 | -0.49 | -1.2    |
| vis1                       | 0.10  | 0.03  | -74.0   | vis                      | -0.50 | -0.36 | -28.2   |
| vis2                       | -1.50 | -1.57 | 4.9     |                          |       |       |         |
| vis3                       | 1.20  | 1.16  | -3.3    |                          |       |       |         |
| vis4                       | -0.40 | -0.39 | -2.5    |                          |       |       |         |
| vis5                       | 0.80  | 0.76  | -5.1    |                          |       |       |         |
| vis6                       | -0.30 | -0.31 | 3.0     |                          |       |       |         |
| vis7                       | -1.00 | -1.06 | 6.0     |                          |       |       |         |
